# Supplementary material
Source: PubMed Central journal article supplement (PMC2224166)

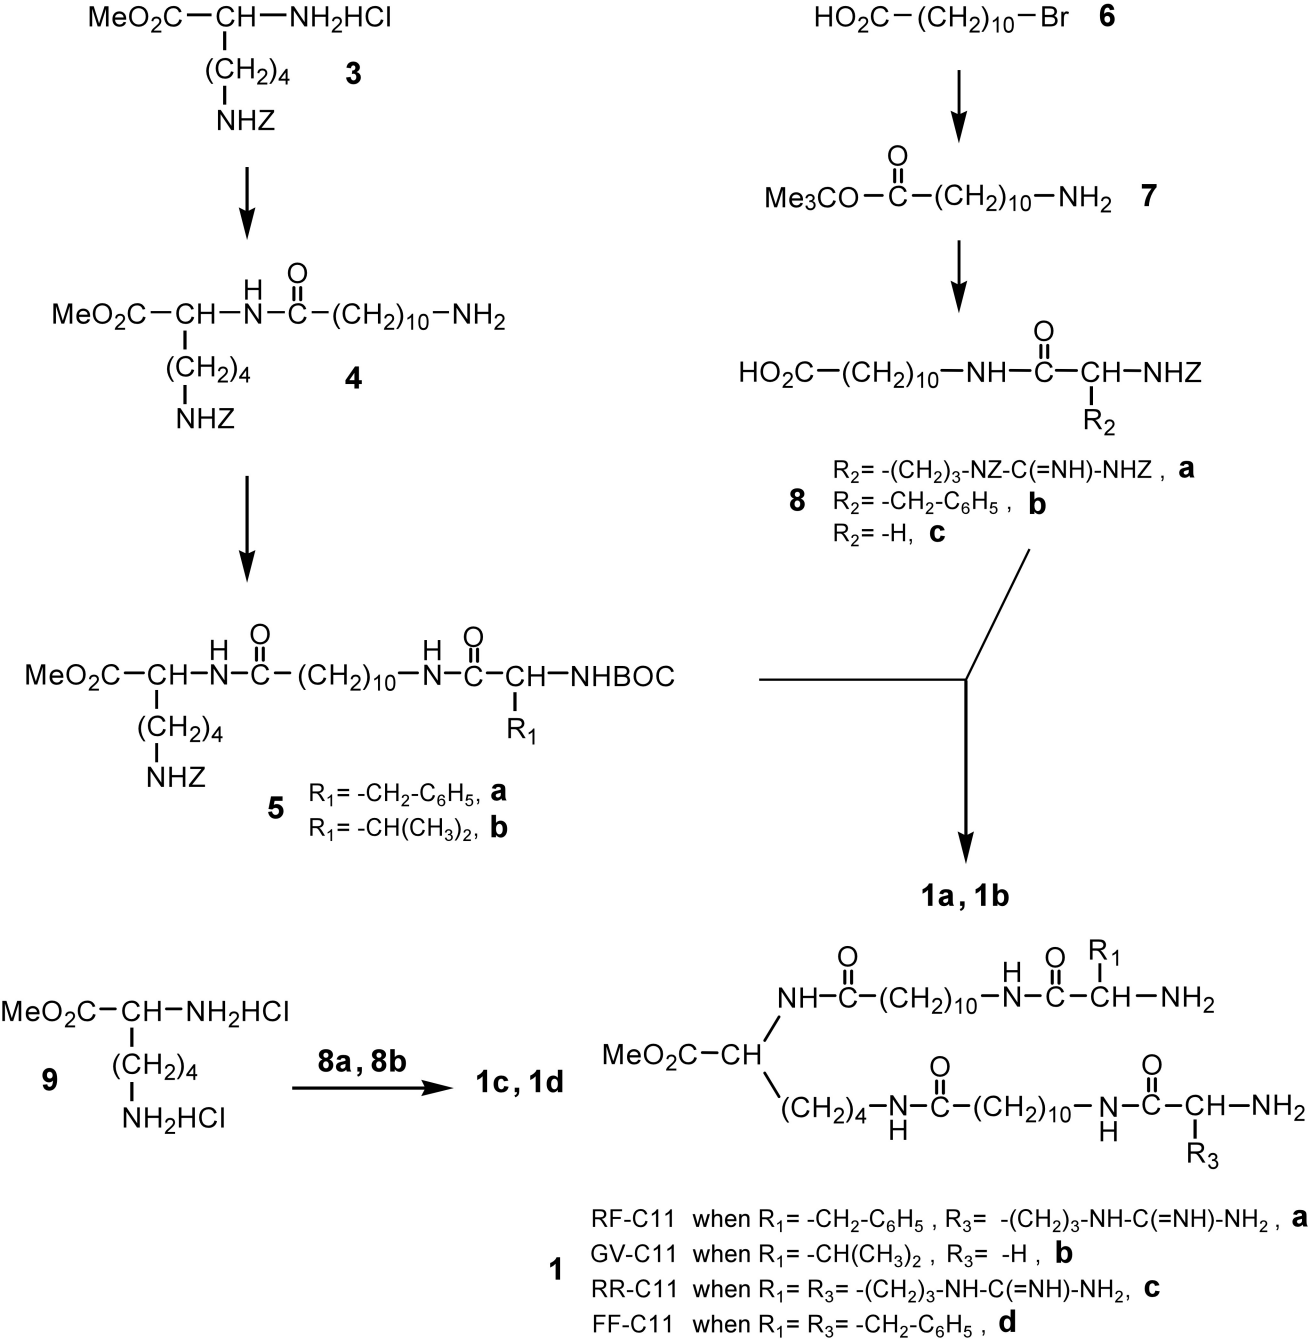

Supplement: pnas_0708465105_1.pdf [file pnas_0708465105_1.pdf]

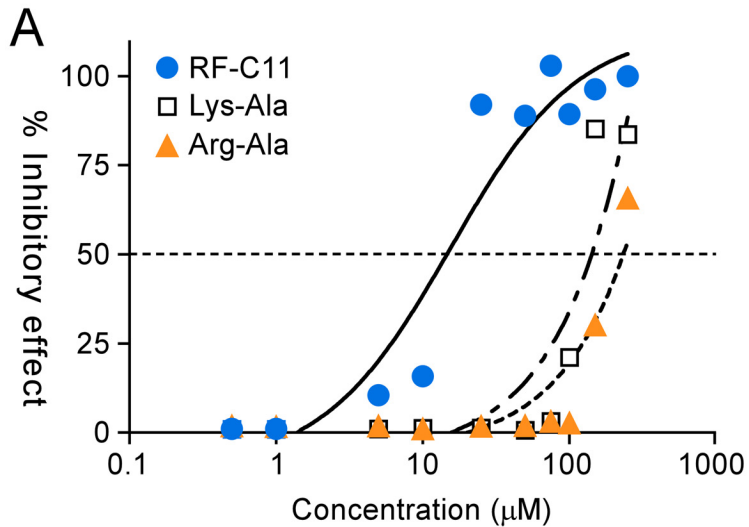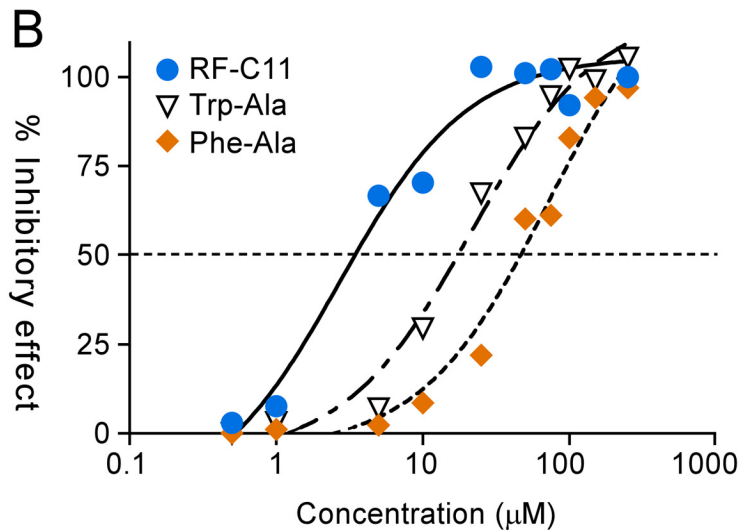

Supplement: pnas_0708465105_3.pdf [file pnas_0708465105_3.pdf]

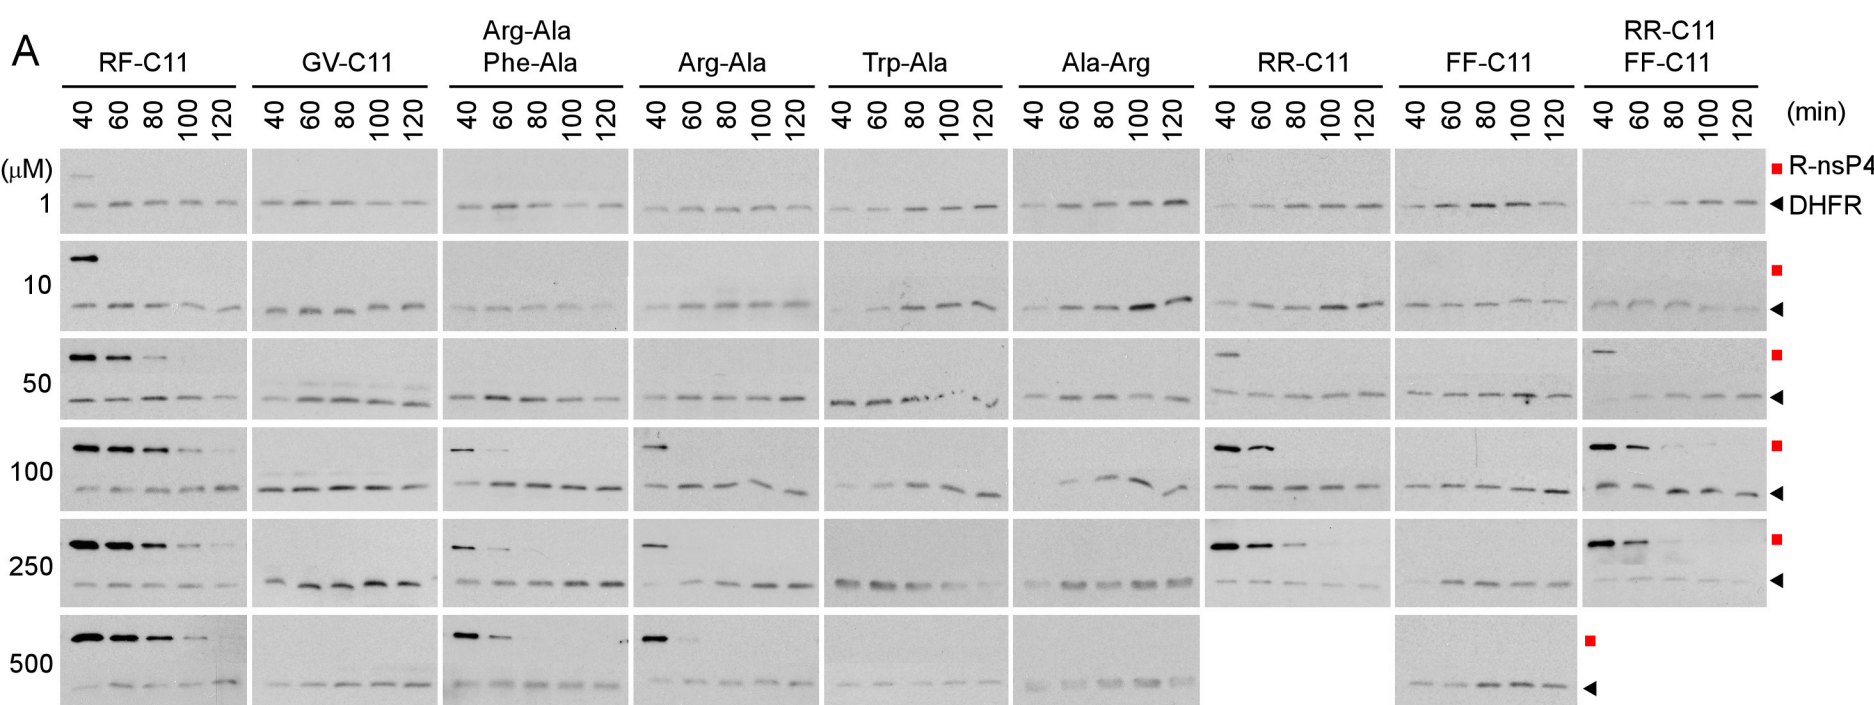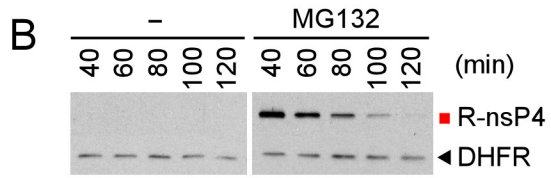

Supplement: pnas_0708465105_4.pdf [file pnas_0708465105_4.pdf]

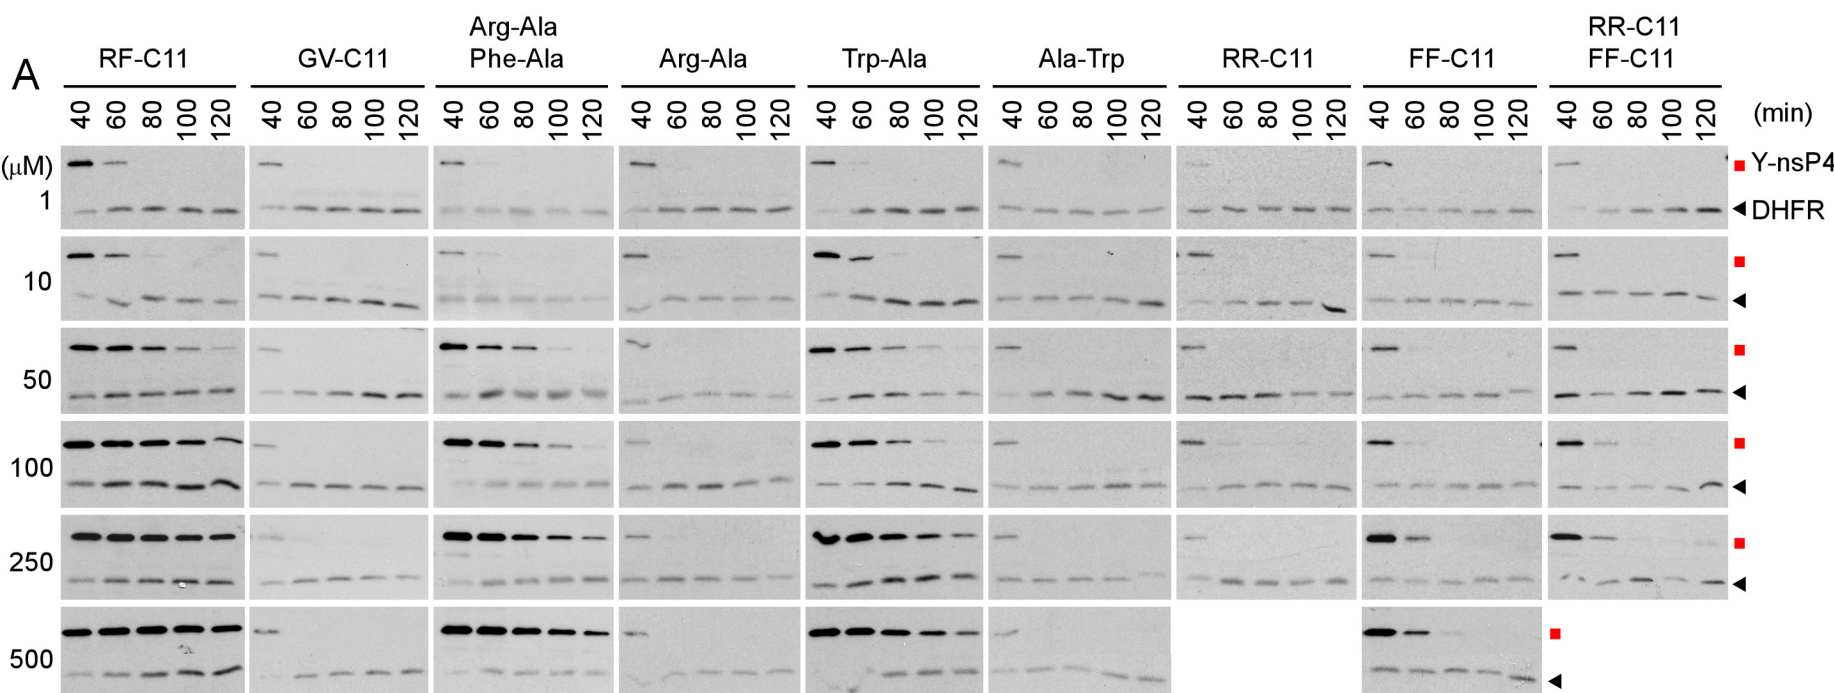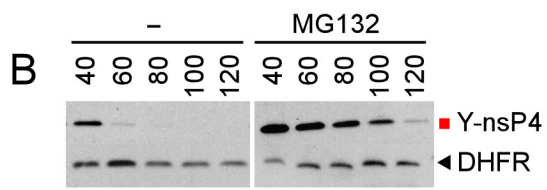

Supplement: pnas_0708465105_5.pdf [file pnas_0708465105_5.pdf]

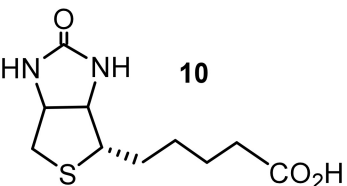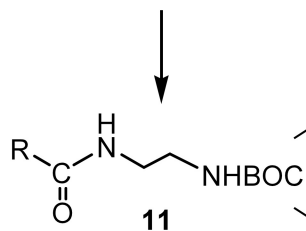

R = biotinyl

**5a**

**1b**

**2b**

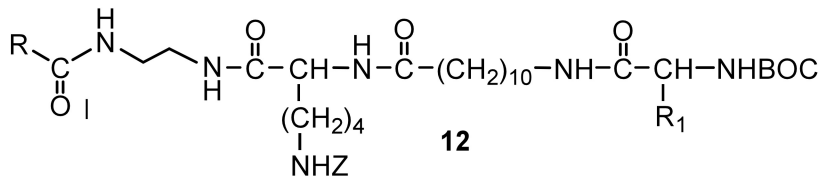

**8a**

**2a**

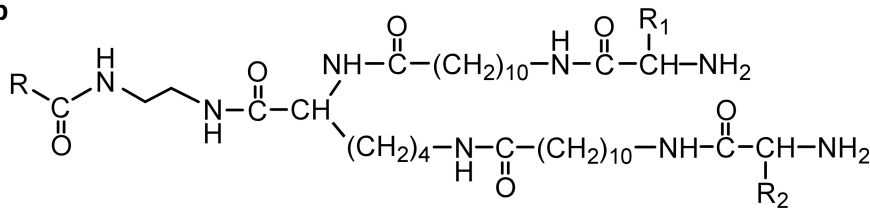

**2**

RF-C11b when  $R_1 = -CH_2-C_6H_5$ ,  $R_2 = -(CH_2)_3-NH-C(=NH)-NH_2$ , **a**

GV-C11b when  $R_1 = -CH(CH_3)_2$ ,  $R_2 = -H$ , **b**

Supplement: pnas_0708465105_6.pdf [file pnas_0708465105_6.pdf]

**GV-C11**

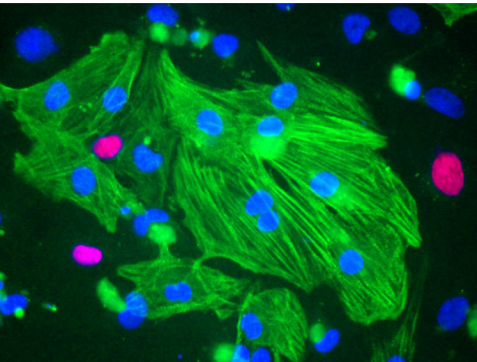

**RF-C11**

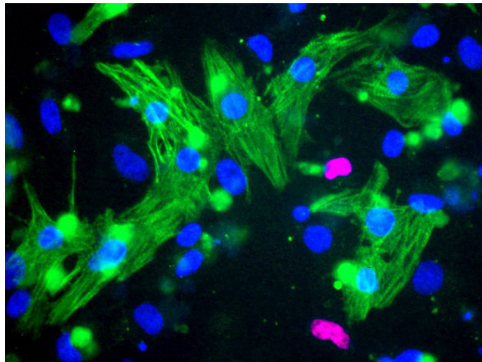

**Tropinin I / BrdU / DAPI**

Supplement: pnas_0708465105_7.pdf [file pnas_0708465105_7.pdf]
